# Supplementary material for: Understanding of the formation of shallow level defects from the intrinsic defects of lead tri-halide perovskites
Source: Royal Society of Chemistry journal article supplement (doi:10.1039/c6cp02886a), 2016-01-01
Supplement: c6cp02886a1.pdf [file c6cp02886a1.pdf]

## Supporting Information

for

### Understanding of the Formation of Shallow Level Defects from the Intrinsic Defects of Lead Tri-Halide Perovskites

*Jongseob Kim<sup>†</sup>, Choong-Heui Chung<sup>‡</sup>, and Ki-Ha Hong<sup>\*‡</sup>*

<sup>†</sup>Samsung Advanced Institute of Technology, Samsung Electronics Co., Ltd. Yongin-Si,  
Gyeonggi-Do, 446-712, Korea

<sup>‡</sup> Department of Materials Science and Engineering, Hanbat National University, 125  
Dongseo-daero, Yuseong-Gu, Daejeon, 34014, Korea

Email: [kiha.hong@hanbat.ac.kr](mailto:kiha.hong@hanbat.ac.kr)

Table S1. Lattice structures (calculated lattice structures with the GGA exchange correlation), band gaps, and formation energies of the halide vacancy ( $E_F(V_{\text{Halide}})$ ) and the Pb ( $E_F(V_{\text{Pb}})$ ) of methylammonium lead trihalides. In this study, we used pseudo-tetragonal unit lattice structures for each perovskite.

|                               | MAPbI <sub>3</sub>                | MAPbBr <sub>3</sub>               | MAPbCl <sub>3</sub>               |
|-------------------------------|-----------------------------------|-----------------------------------|-----------------------------------|
| Lattice Constants             | a=9.08 Å<br>b=9.02 Å<br>c=12.77 Å | a=8.41 Å<br>b=8.35 Å<br>c=11.86 Å | a=8.14 Å<br>b=8.00 Å<br>c=11.28 Å |
| Band gap<br>GGA (eV)          | 1.87                              | 2.26                              | 2.70                              |
| $E_F(V_{\text{Halide}})$ (eV) | 2.21                              | 2.93                              | 3.28                              |
| $E_F(V_{\text{Pb}})$ (eV)     | 2.69                              | 3.37                              | 3.74                              |
